# Supplementary material
Source: publisher figshare collection journal article supplement (https://acs.figshare.com/ndownloader/files/21876885)
Supplement: Supplementary file 1 [file 21876885]

# Supporting Information to: Structural Investigations of $\text{MA}_{1-x}\text{DMA}_x\text{PbI}_3$ mixed-cation perovskites

Wouter M.J. Franssen, Cathy M.M. van Heumen, and Arno P.M. Kentgens

Magnetic Resonance Research Center, Institute for Molecules and Materials, Radboud University,  
Heyendaalseweg 135, 6525 AJ Nijmegen, The Netherlands

## Table of contents

- Figure S1: Room temperature crystal structure of  $\text{MAPbI}_3$ .
- Figure S2: Room temperature crystal structure of  $\text{DMAPbI}_3$ .
- Figure S3:  $^1\text{H}$  saturation recovery  $T_1$  measurement of  $\text{MAPbI}_3$ .
- Figure S4:  $^{13}\text{C}$  saturation recovery  $T_1$  measurement of  $\text{MAPbI}_3$ .
- Figure S5:  $^1\text{H}$  saturation recovery  $T_1$  measurement of  $\text{DMAPbI}_3$ .
- Figure S6:  $^{13}\text{C}$  saturation recovery  $T_1$  measurement of  $\text{DMAPbI}_3$ .
- Figure S7:  $^{207}\text{Pb}$  saturation recovery  $T_1$  measurement of  $\text{DMAPbI}_3$ .
- Figure S8:  $^{13}\text{C}$  saturation recovery  $T_1$  measurement of DMA in  $\text{MAPbI}_3$ .
- Figure S9:  $^{207}\text{Pb}$  saturation recovery  $T_1$  measurement of the 95:5 sample.
- Figure S10:  $^{14}\text{N}$  MAS spectra of  $\text{MAPbI}_3$  (100:0 sample) at various temperatures.
- Figure S11: Static  $^{14}\text{N}$  spectra of  $(\text{DMA:MA})\text{PbI}_3$  (95:5 sample) at various temperatures.
- Figure S12: Static  $^{14}\text{N}$  spectra of  $(\text{DMA:MA})\text{PbI}_3$  (90:10 sample) at various temperatures.
- Figure S13: Static  $^{14}\text{N}$  spectra of  $(\text{DMA:MA})\text{PbI}_3$  (80:20 sample) at various temperatures.
- Figure S14:  $^{14}\text{N}$  saturation recovery  $T_1$  measurement of the MA cation in the 80:20 sample.
- Figure S15:  $^{14}\text{N}$  saturation recovery  $T_1$  measurement of the DMA cation in the 80:20 sample.

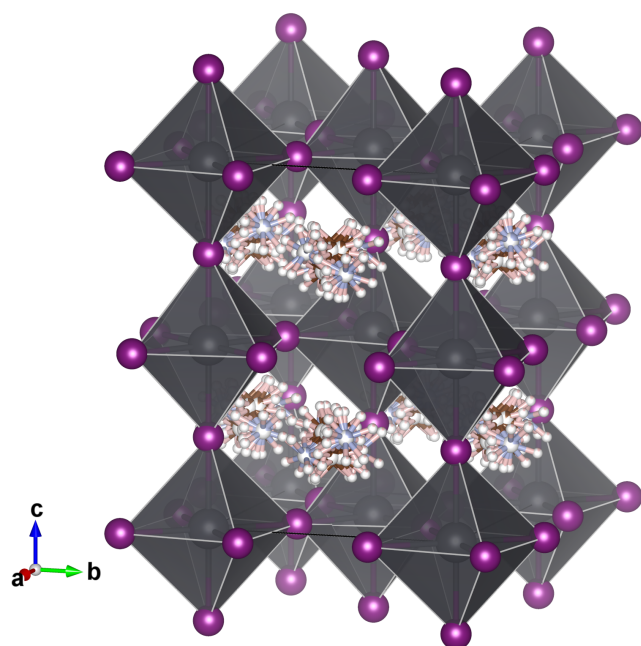

**Figure S1:** Room temperature crystal structure of  $\text{MAPbI}_3$ .

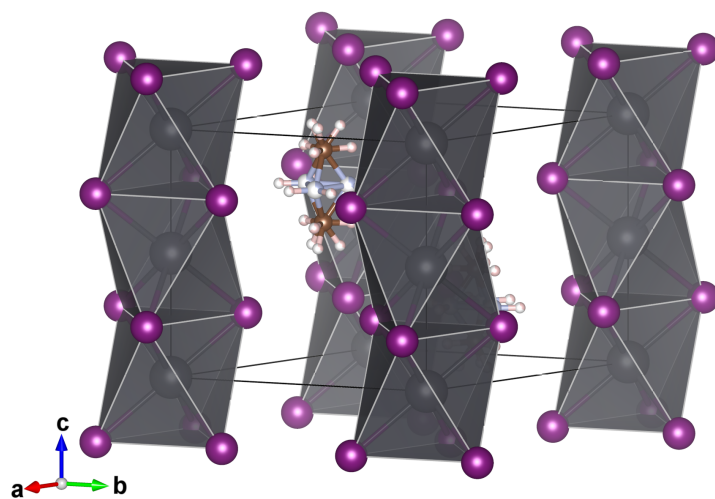

**Figure S2:** Room temperature crystal structure of  $\text{DMAPbI}_3$ .

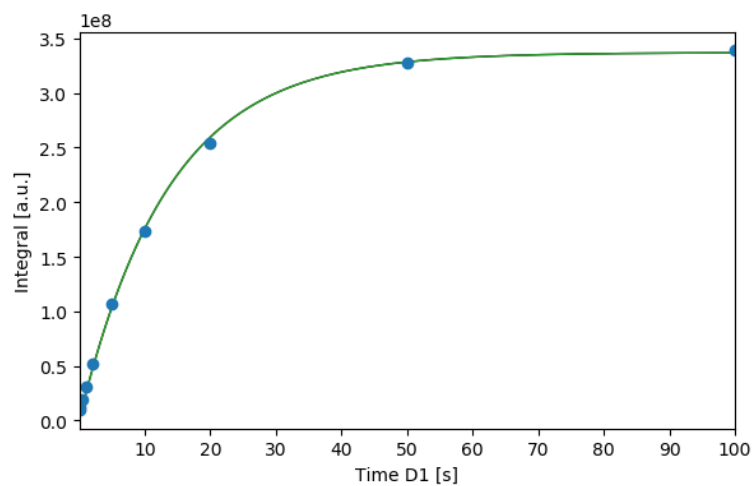

**Figure S3:**  $^1\text{H}$  saturation recovery  $T_1$  measurement of  $\text{MAPbI}_3$ . Measured at 20 T and 22 kHz MAS.

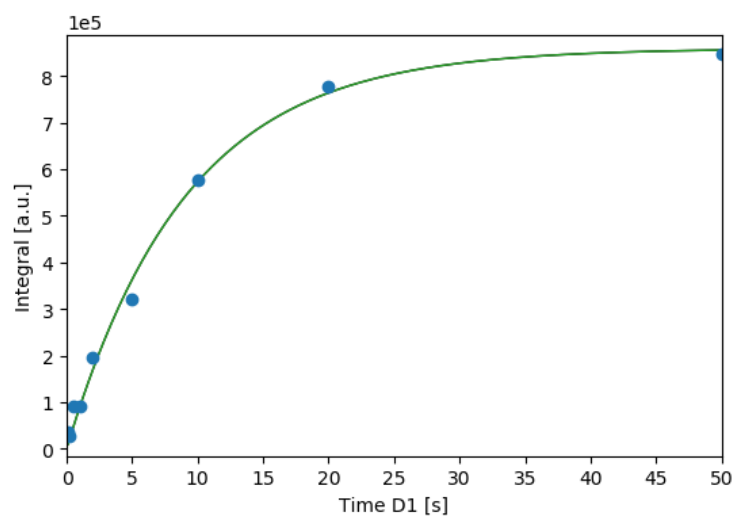

**Figure S4:**  $^{13}\text{C}$  saturation recovery  $T_1$  measurement of  $\text{MAPbI}_3$ . Measured at 20 T, 80 kHz  $^1\text{H}$  decoupling, and 22 kHz MAS.

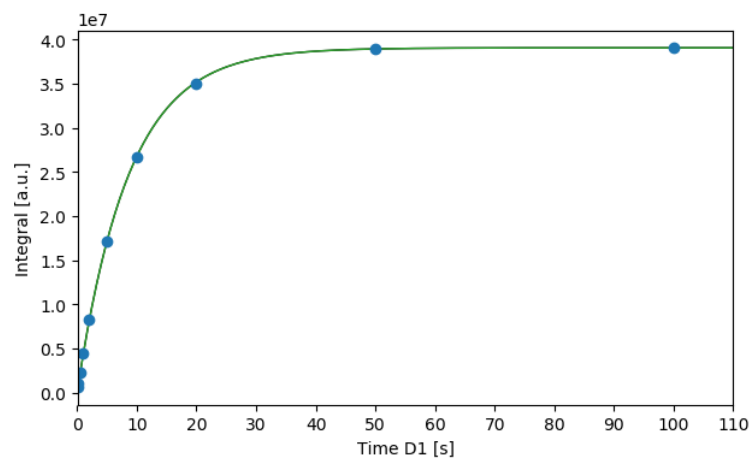

**Figure S5:**  $^1\text{H}$  saturation recovery  $T_1$  measurement of  $\text{DMAPbI}_3$ . Measured at 20 T and 20 kHz MAS.

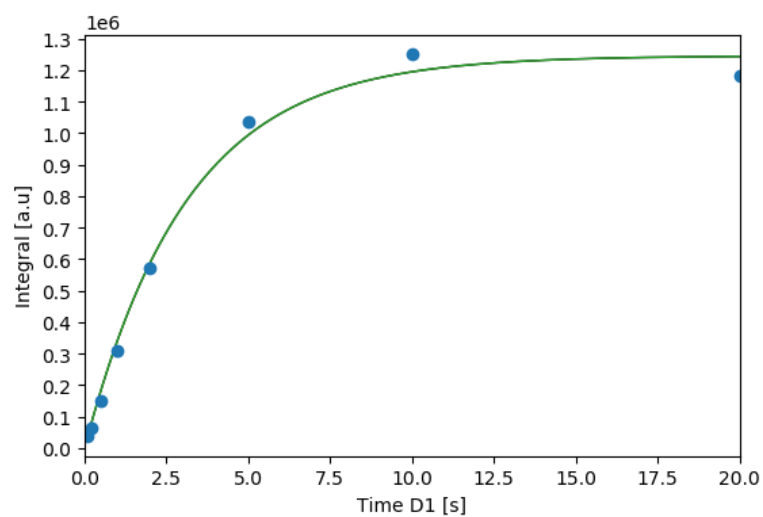

**Figure S6:**  $^{13}\text{C}$  saturation recovery  $T_1$  measurement of  $\text{DMAPbI}_3$ . Measured at 20 T, 80 kHz  $^1\text{H}$  decoupling, and 20 kHz MAS.

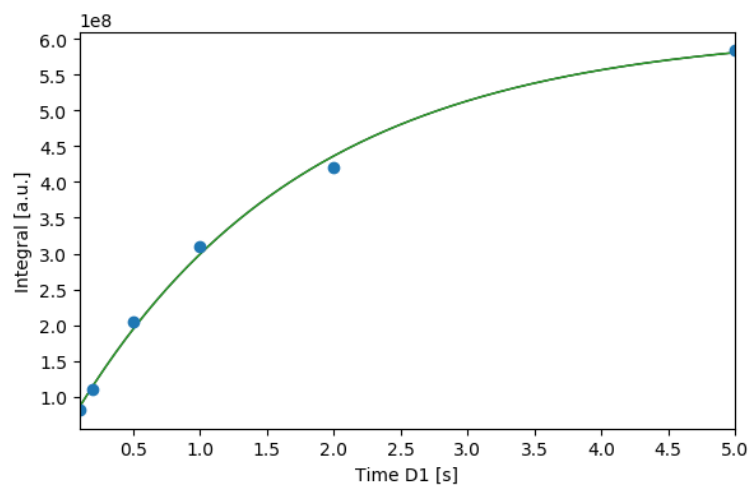

**Figure S7:**  $^{207}\text{Pb}$  saturation recovery  $T_1$  measurement of  $\text{DMApbi}_3$ . Measured at 20 T and using no MAS (static).

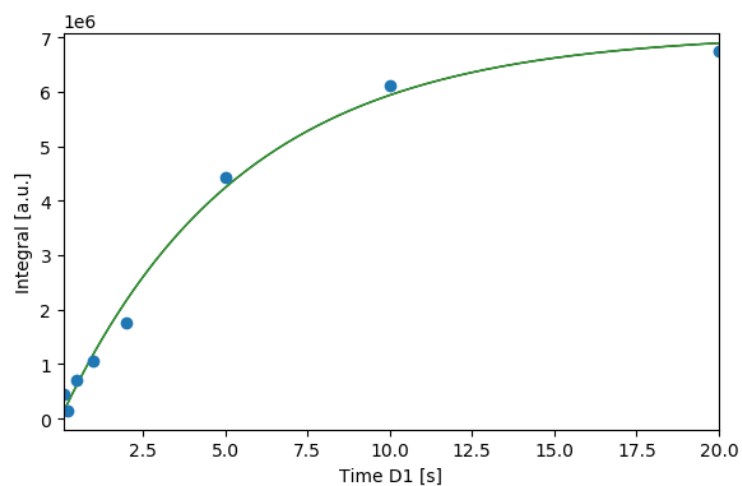

**Figure S8:**  $^{13}\text{C}$  saturation recovery  $T_1$  measurement of DMA in  $\text{MAPbI}_3$ . Measured at 20 T, 80 kHz  $^1\text{H}$  decoupling, and 17.5 kHz MAS.

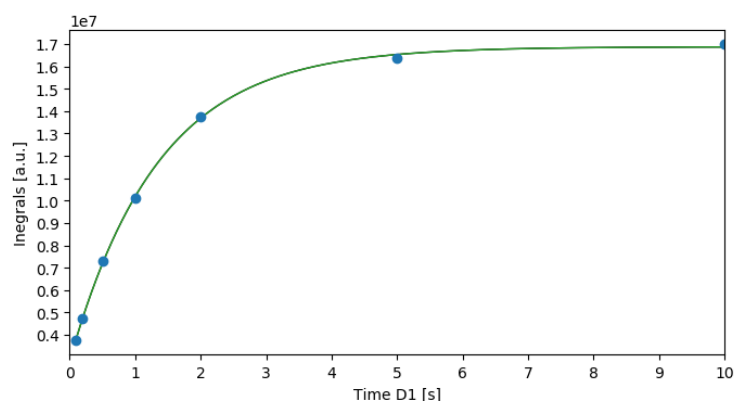

**Figure S9:**  $^{207}\text{Pb}$  saturation recovery  $T_1$  measurement of the 95:5 sample. Measured at 20 T and using no MAS (static).

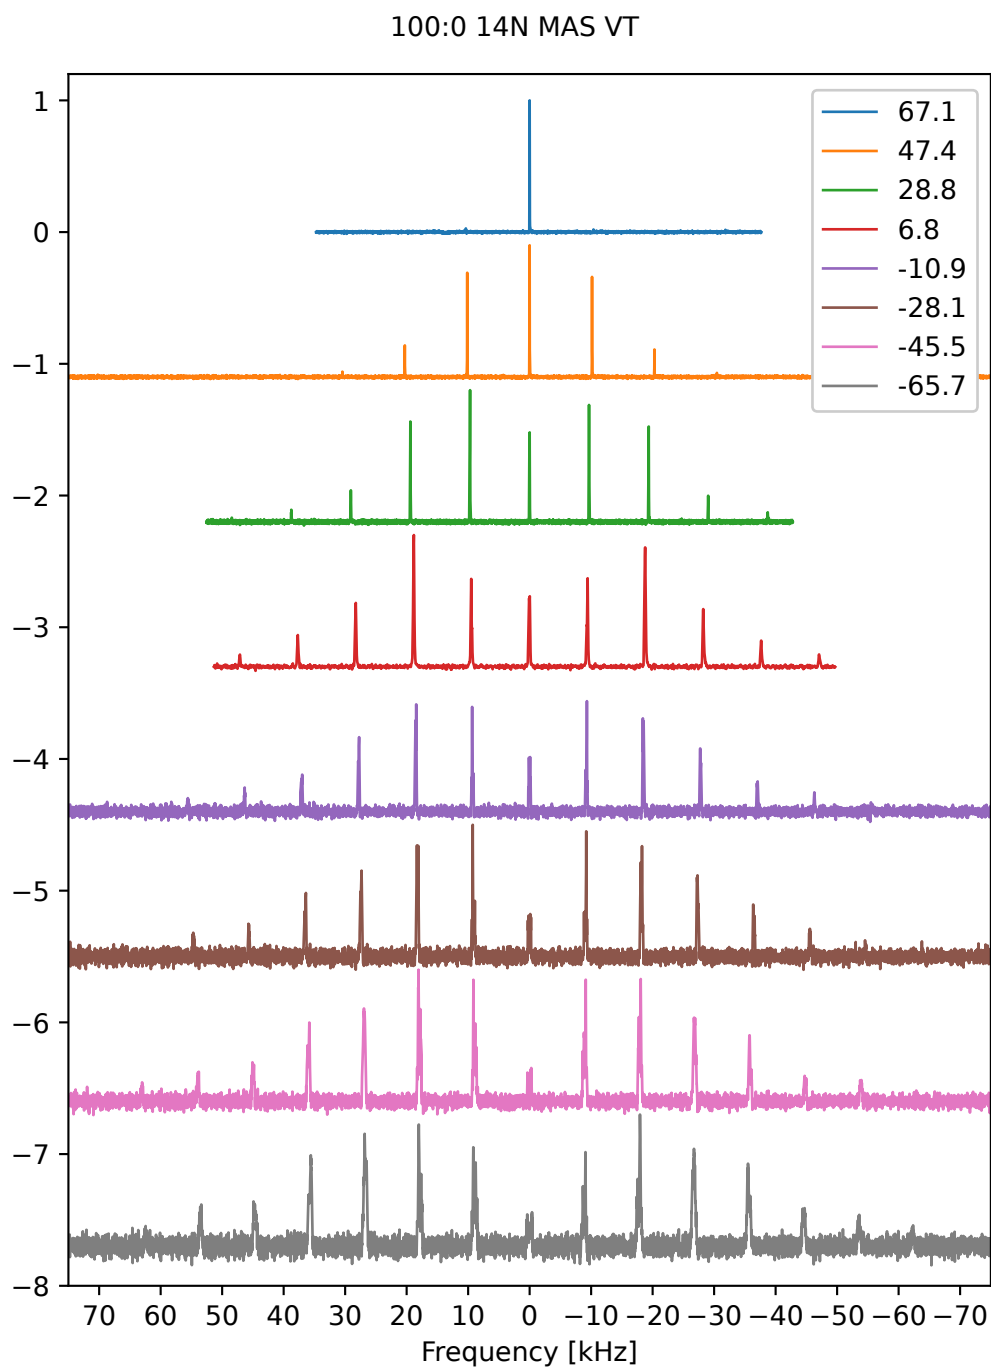

**Figure S10:**  $^{14}\text{N}$  MAS spectra of  $\text{MAPbI}_3$  (100:0 sample) at various temperatures ( $^{\circ}\text{C}$ ), measured at 9.4 T and using 9 kHz MAS. The integrals of the sidebands have been fit (assuming  $\eta = 0$ ) to obtain the  $C_Q$  as a function of temperature. Based on this value, the FWHM of the static line width has been estimated, using the distance between the maxima of the powder pattern.

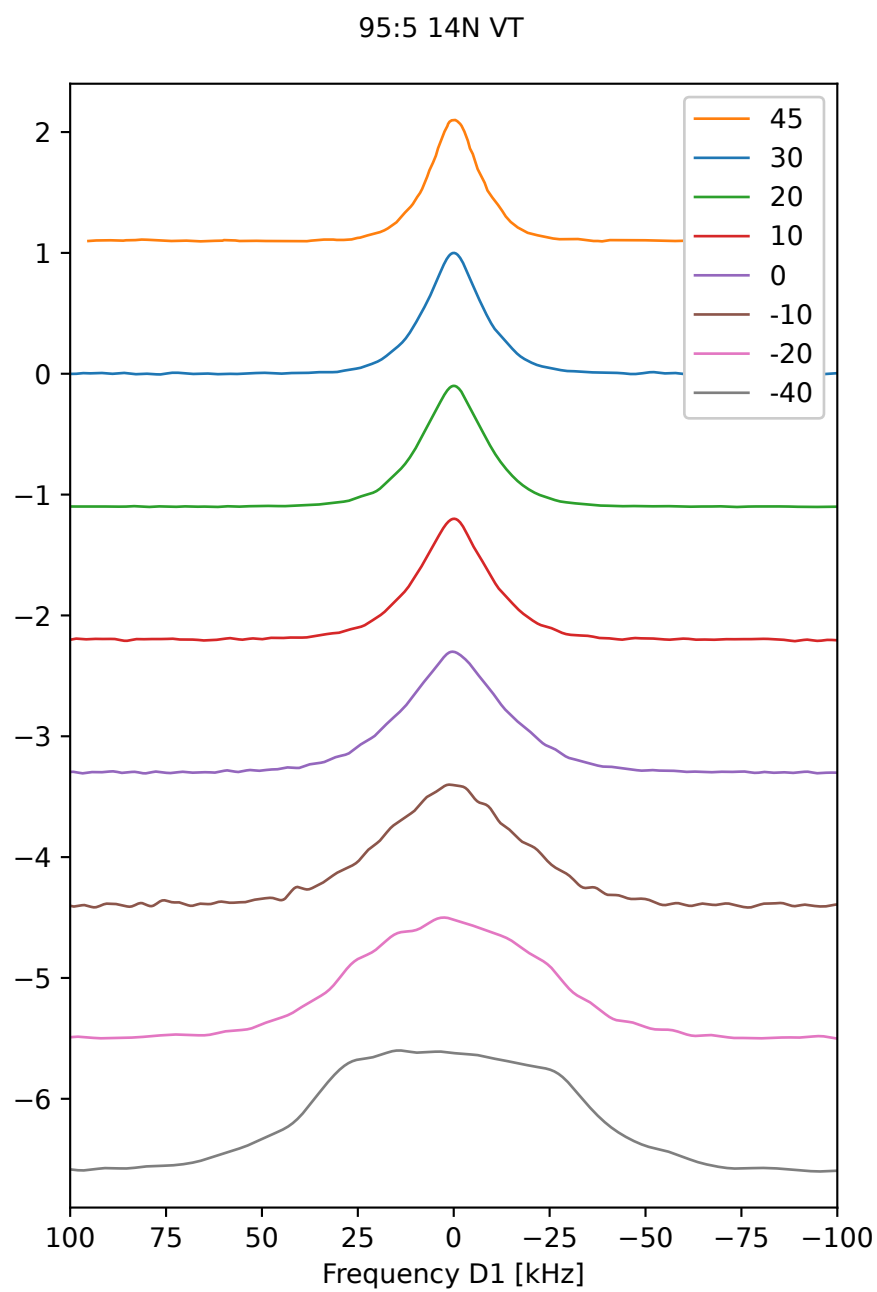

**Figure S11:** Static  $^{14}\text{N}$  spectra of (DMA:MA) $\text{PbI}_3$  (95:5 sample) at various temperatures ( $^{\circ}\text{C}$ ), measured at 20 T.



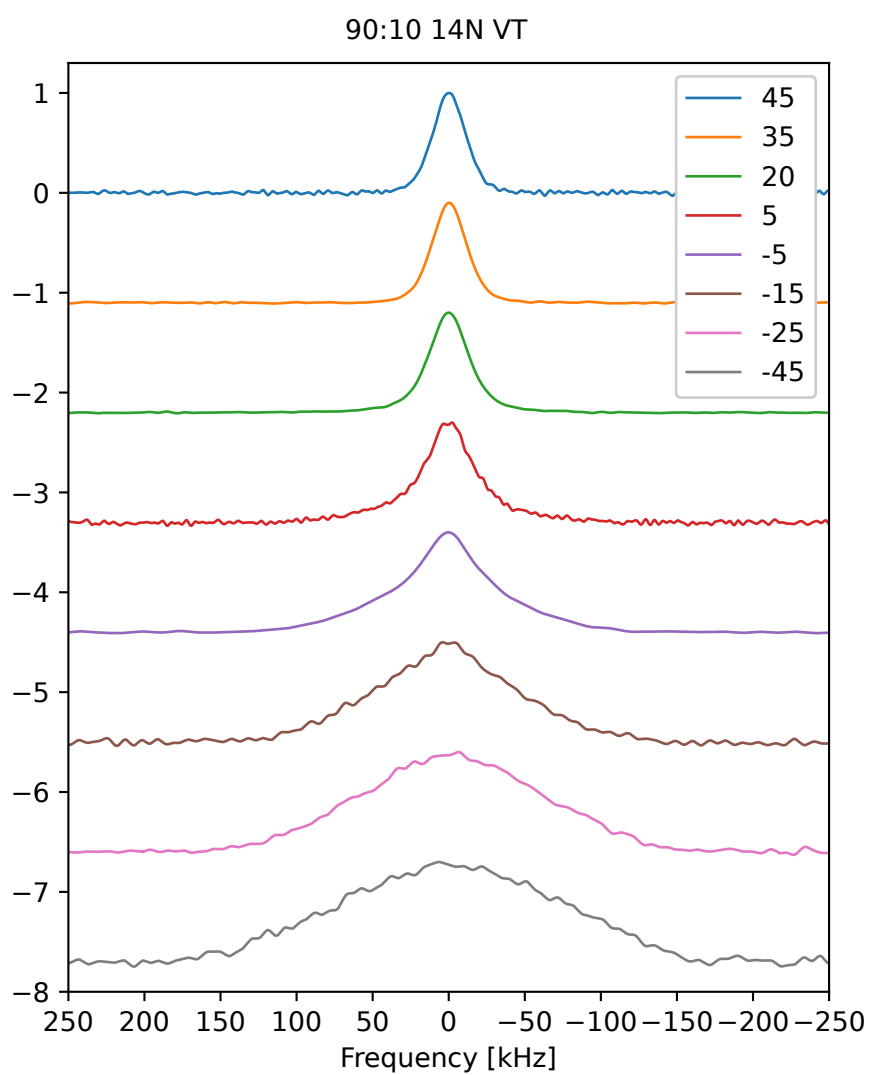

**Figure S12:** Static  $^{14}\text{N}$  spectra of (DMA:MA) $\text{PbI}_3$  (90:10 sample) at various temperatures ( $^{\circ}\text{C}$ ), measured at 20 T.

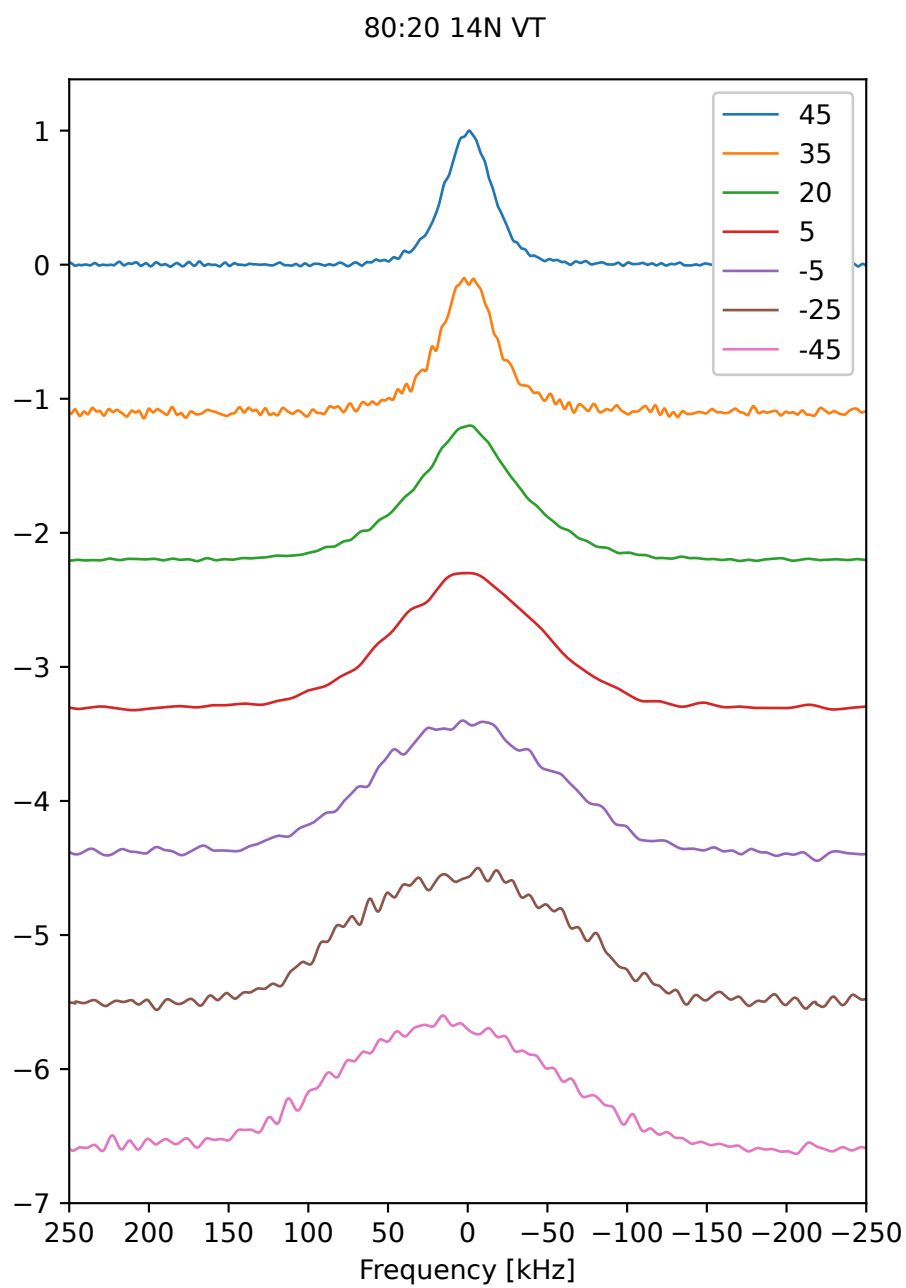

**Figure S13:** Static  $^{14}\text{N}$  spectra of (DMA:MA) $\text{PbI}_3$  (80:20 sample) at various temperatures ( $^{\circ}\text{C}$ ), measured at 20 T.

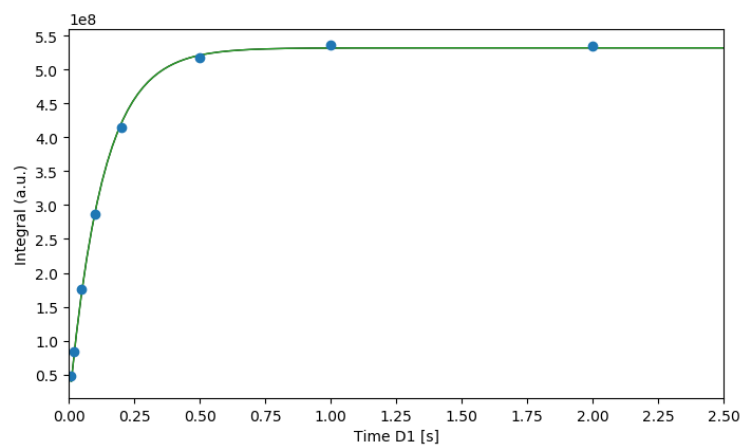

**Figure S14:**  $^{14}\text{N}$  saturation recovery  $T_1$  measurement of the MA cation in the 80:20 sample, used for establishing the reorientation time. The full curve shows the fit.

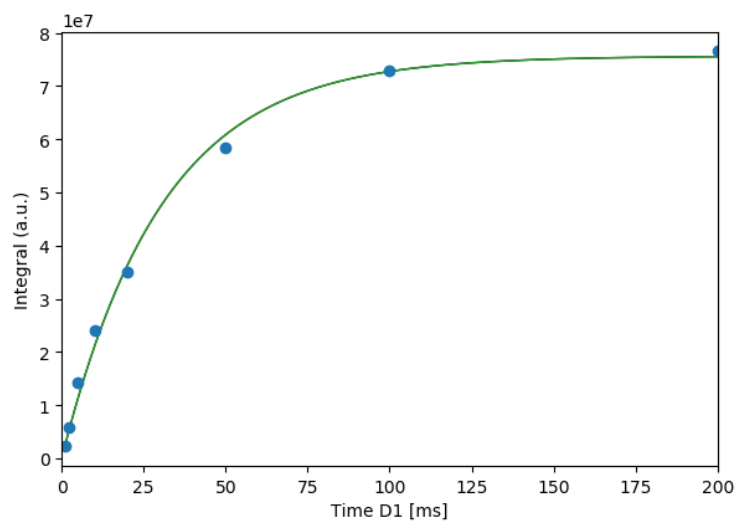

**Figure S15:**  $^{14}\text{N}$  saturation recovery  $T_1$  measurement of the DMA cation in the 80:20 sample, used for establishing the reorientation time. The full curve shows the fit.
